# Supplementary material for: Heterogeneous reaction of toluene/NO2/O3 on α-Fe2O3 nanoparticles: the impacts of O3, light illumination, and relative humidity on the formation of N-containing organic compounds (NOC)
Source: Royal Society of Chemistry journal article supplement (doi:10.1039/d2en00426g), 2022-01-01
Supplement: d2en00426g1.pdf [file d2en00426g1.pdf]

## Heterogeneous reaction of toluene/NO<sub>2</sub>/O<sub>3</sub> on $\alpha$ -Fe<sub>2</sub>O<sub>3</sub> nanoparticles: The impacts of O<sub>3</sub>, light illumination and relative humidity on the N-containing organic compounds (NOC) formation

Xiang He<sup>1,2,3,\*</sup>, Zhi-Cheng Ma<sup>1,2,3</sup>, Xi Xi<sup>1,2,3</sup>, Aiyilaiti Kudesi<sup>1,2,3</sup>, Juan-Mei Wang<sup>1,2,3</sup>

<sup>1</sup> College of Ecology and Environment, Xinjiang University, Urumqi 830017, PR China

<sup>2</sup> Key Laboratory of Oasis Ecology, Ministry of Education, Xinjiang University, Urumqi 830017, PR China

<sup>3</sup> Xinjiang Jinghe Observation and Research Station of Temperate Desert Ecosystem, Ministry of Education, Xinjiang University, Urumqi 830017, PR China

\*Correspondence and requests for materials should be addressed to X. He (xianghe@xju.edu.cn)

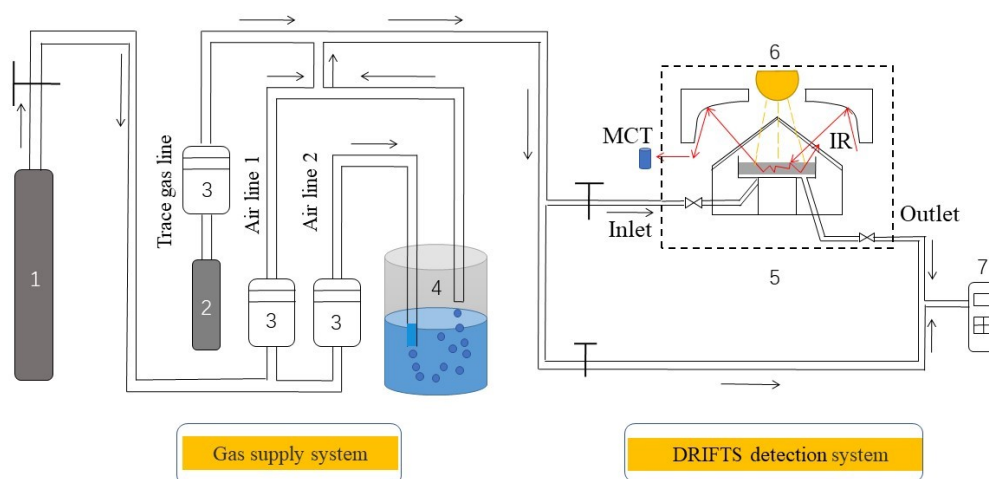

**Fig. S1.** The schematic diagram of the DRIFT reaction system. Note: 1. High-pure air cylinder; 2. Trace gas generator; 3. Mass flow meter; 4. Water vapor generator; 5. Reaction chamber; 6. Xenon lamp generator; 7. Hygrometer.

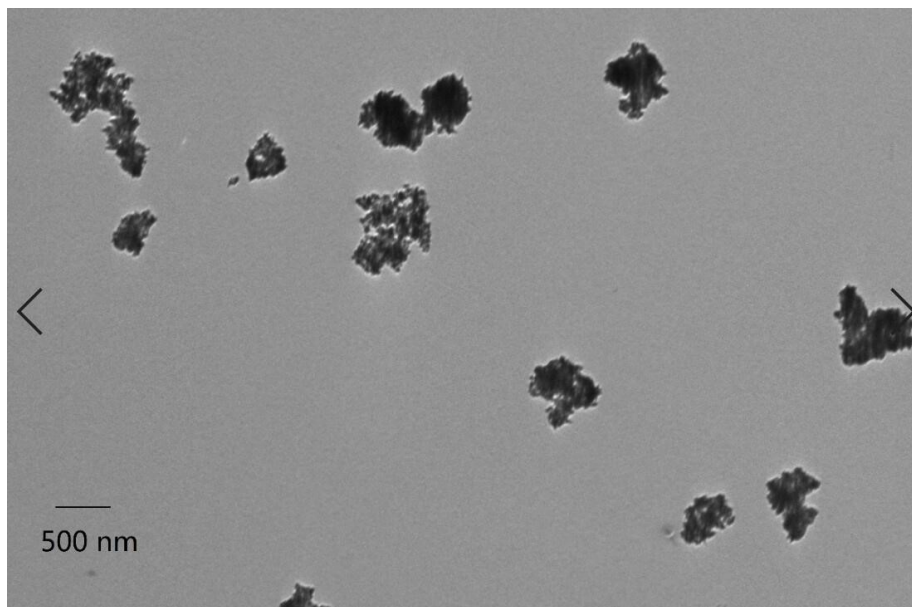

**Fig. S2.** TEM images of the  $\alpha$ -Fe<sub>2</sub>O<sub>3</sub> nanoparticles.

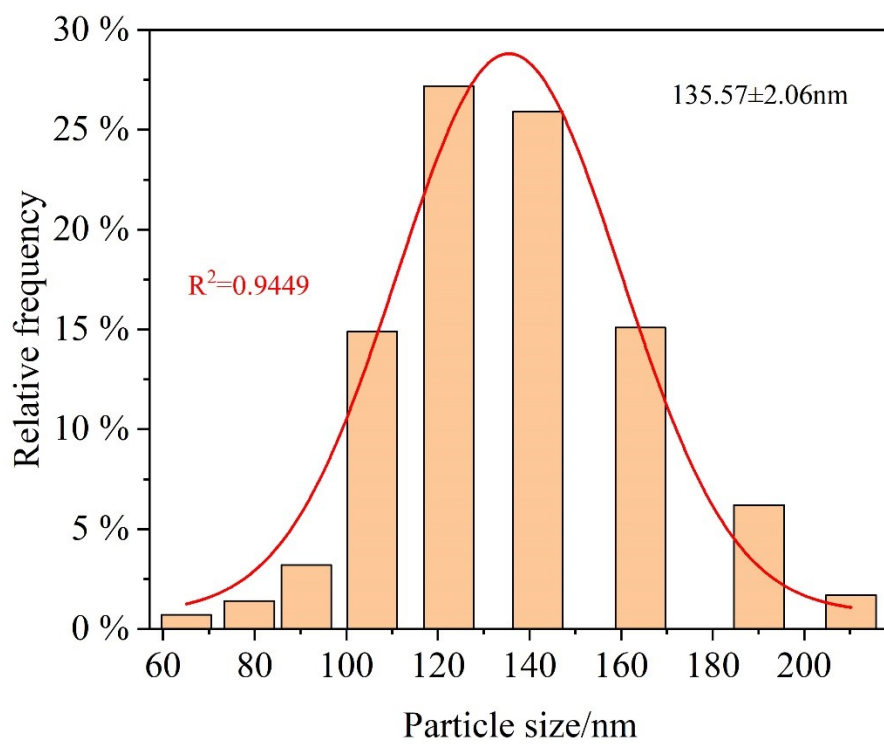

**Fig. S3.** Particle size distributions of the  $\alpha$ -Fe<sub>2</sub>O<sub>3</sub> nanoparticles.

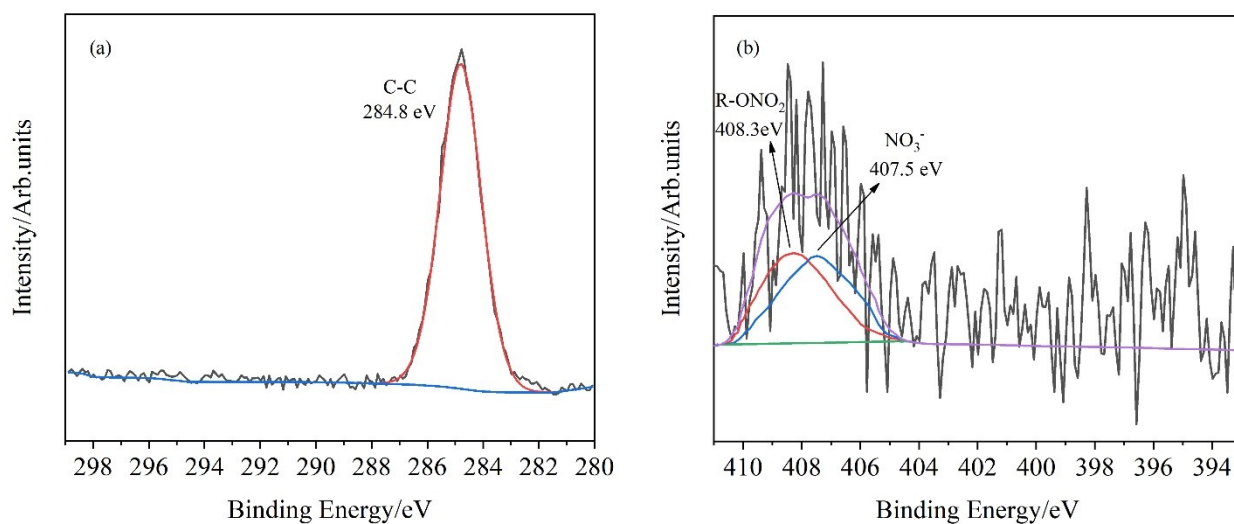

**Fig. S4.** Products after the heterogeneous reaction of toluene/NO<sub>2</sub> with  $\alpha$ -Fe<sub>2</sub>O<sub>3</sub> nanoparticles observed by (a) C 1s and (b) N 1s regions by XPS.

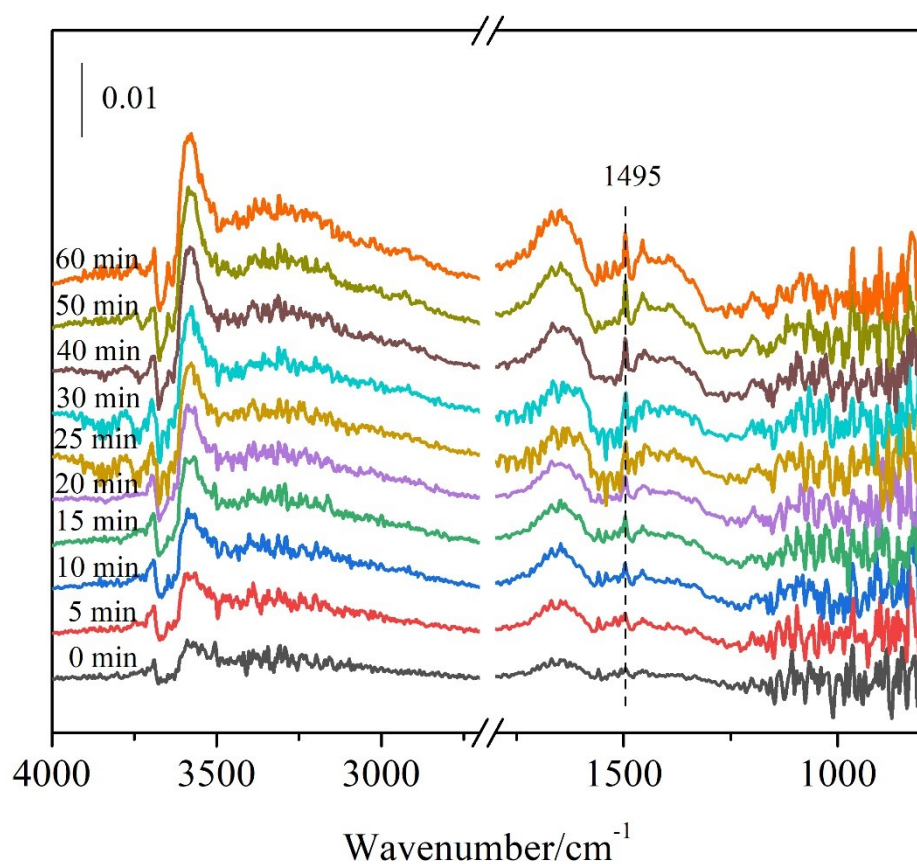

**Fig. S5.** In situ DRIFTS spectra of heterogeneous reaction of toluene with  $\alpha$ -Fe<sub>2</sub>O<sub>3</sub> nanoparticle as a function of time under dark condition. Conditions: [toluene]  $\sim 7.4 \times 10^{14}$  molecules  $\cdot$  cm<sup>-3</sup>. The Y-axis stands for absorbance.

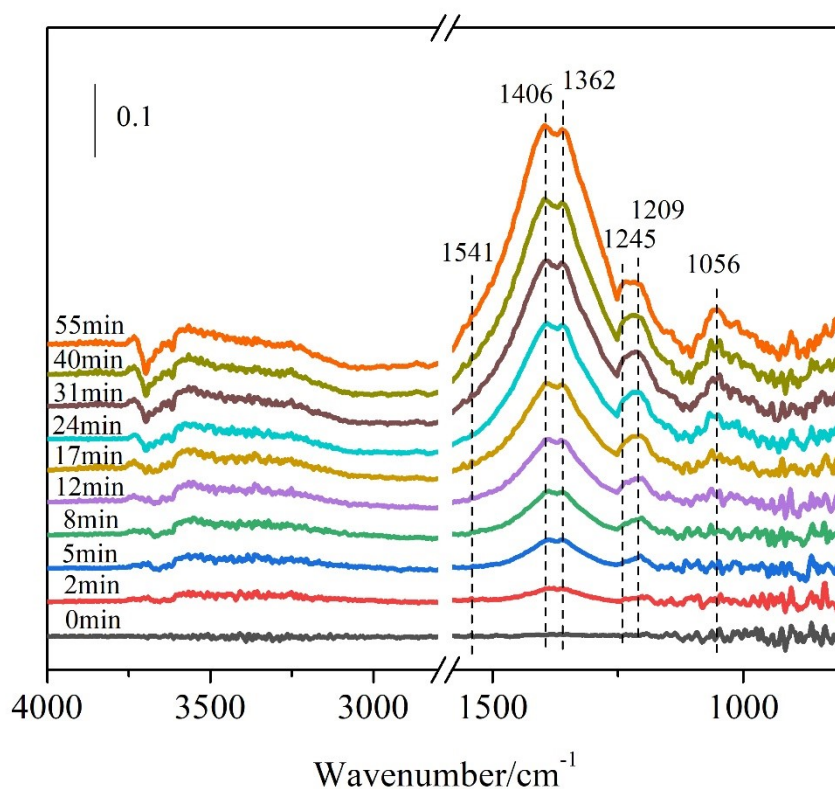

**Fig. S6.** In situ DRIFTS spectra of heterogeneous reaction of  $\text{NO}_2$  with  $\alpha\text{-Fe}_2\text{O}_3$  nanoparticle as a function of time under dark condition. Conditions:  $[\text{NO}_2] \sim 7.4 \times 10^{14} \text{ molecules} \cdot \text{cm}^{-3}$ . The Y-axis stands for absorbance.

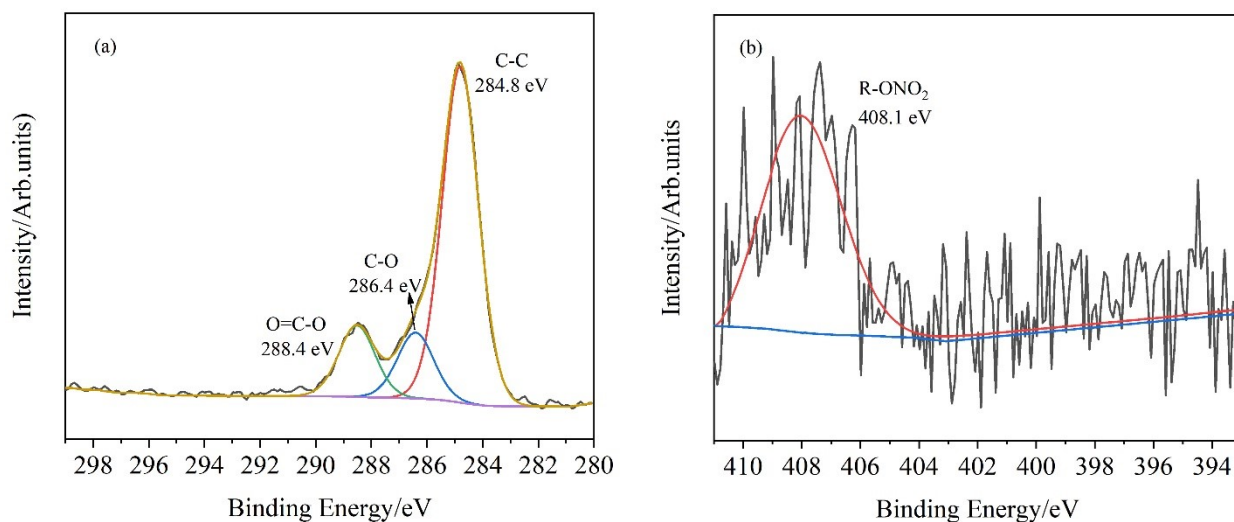

**Fig. S7.** Products after the heterogeneous reaction of toluene/ $\text{NO}_2$ / $\text{O}_3$  with  $\alpha\text{-Fe}_2\text{O}_3$  nanoparticles observed by (a) C 1s and (b) N 1s regions by XPS.

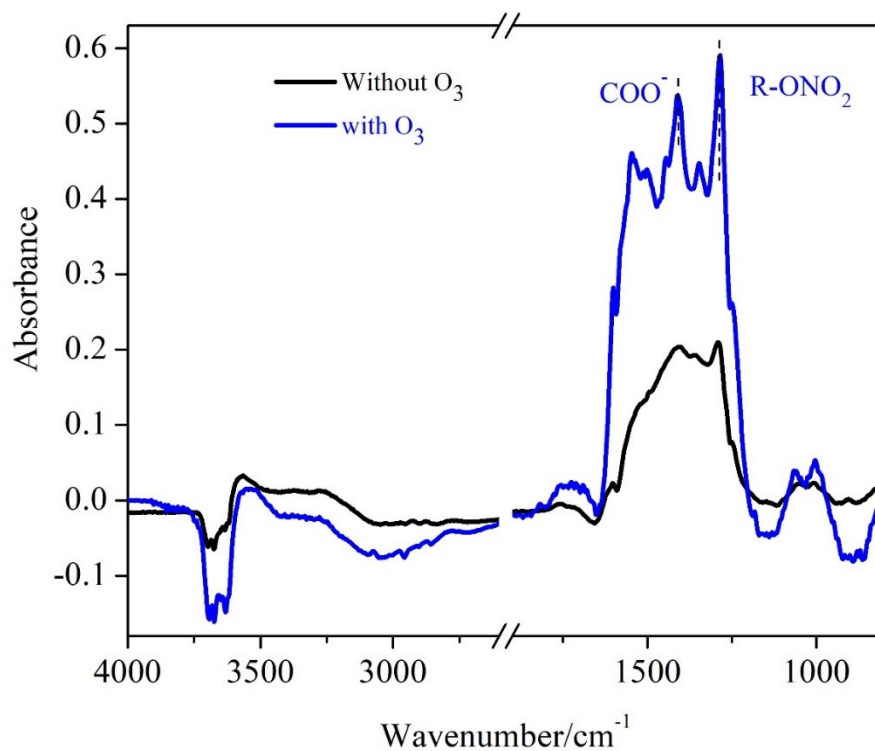

**Fig. S8.** Comparison of the final DRIFTS spectra for  $\alpha$ -Fe<sub>2</sub>O<sub>3</sub> after the reactions with toluene/NO<sub>2</sub> and toluene/NO<sub>2</sub>/O<sub>3</sub>. Conditions: [toluene]  $\sim 7.4 \times 10^{14}$  molecules  $\cdot$  cm<sup>-3</sup>, [NO<sub>2</sub>]  $\sim 7.4 \times 10^{14}$  molecules  $\cdot$  cm<sup>-3</sup>, [O<sub>3</sub>]  $\sim 7.4 \times 10^{14}$  molecules  $\cdot$  cm<sup>-3</sup> and RH $\sim$ 0%.

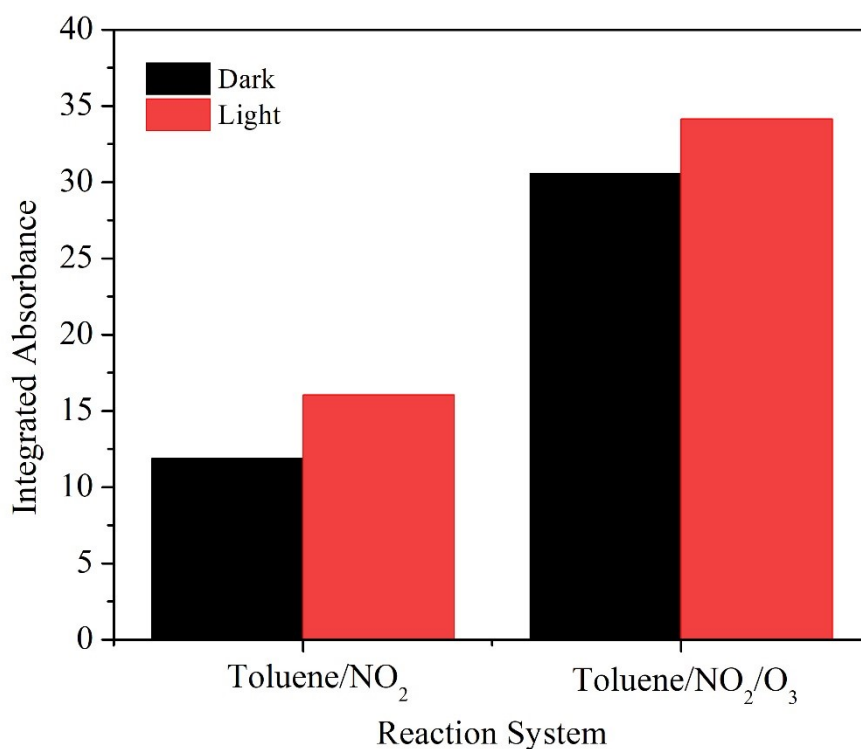

**Fig. S9.** The integrated absorbance of R-ONO species formed on the surface of  $\alpha$ -Fe<sub>2</sub>O<sub>3</sub> nanoparticles after reaction of toluene/NO<sub>2</sub> and toluene/NO<sub>2</sub>/O<sub>3</sub> in the dark and light conditions.

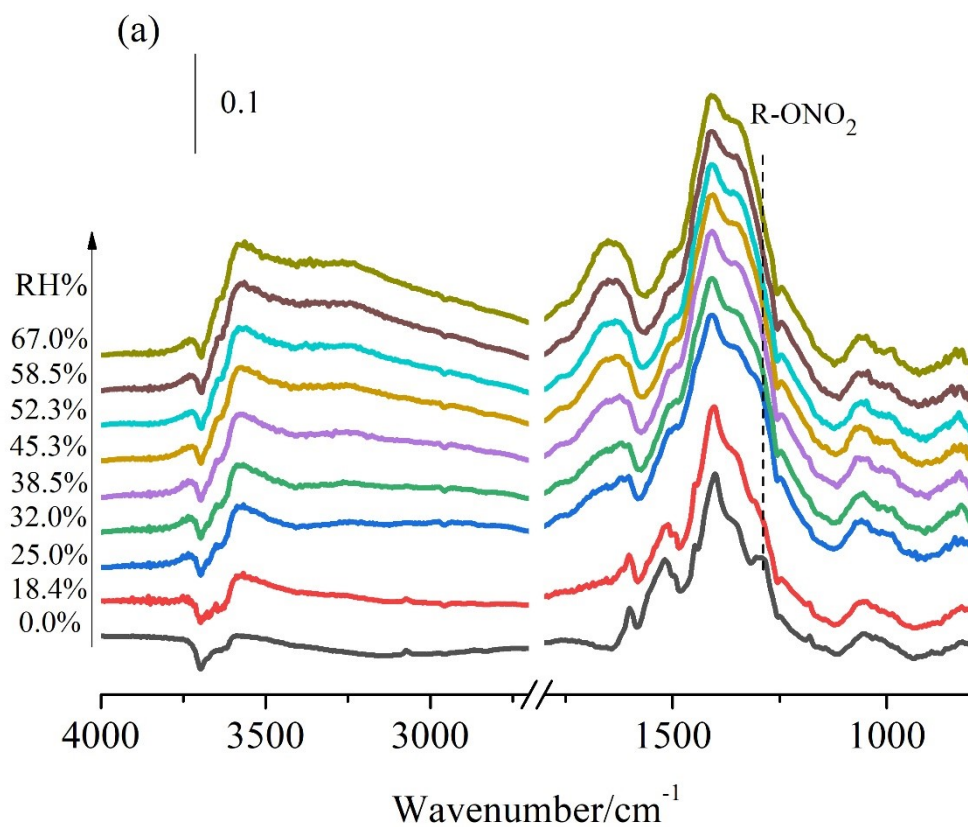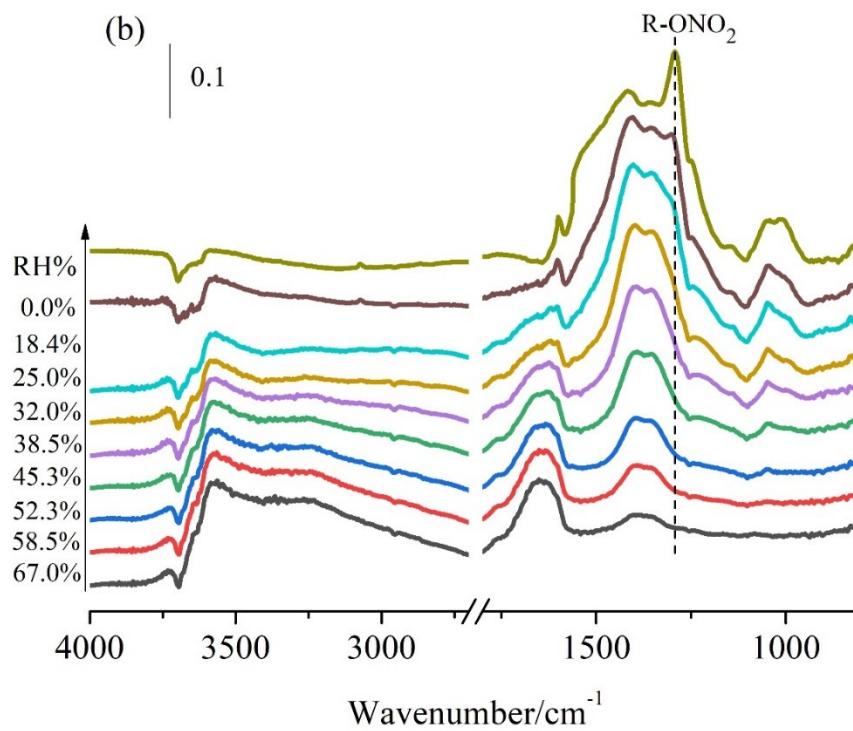

**Fig. S10.** DRIFTS spectra of the heterogeneous reactions of toluene/NO<sub>2</sub>/O<sub>3</sub> with  $\alpha$ -Fe<sub>2</sub>O<sub>3</sub> under simulated irradiation during the dehumidifying (a) and dehumidifying (b) processes. The Y-axis stands for absorbance.
